# Supplementary material for: Sericin nano-gel agglomerates mimicking the pericellular matrix induce the condensation of mesenchymal stem cells and trigger cartilage micro-tissue formation without exogenous stimulation of growth factorsin vitro
Source: Royal Society of Chemistry journal article supplement (doi:10.1039/d3bm00501a), 2023-01-01
Supplement: d3bm00501a3.pdf [file d3bm00501a3.pdf]

## Supporting information



Figure.1 The SEM potography of sericin nanogel.



Figure.2 The Phase contrast microscope photos of MSCs cultured in various medium for 5 days. MSCs concentration began to form in 0.05% and 0.1% sericin nano-gel group. Control: normal media, 0.05% sericin protein: normal medium containing 0.05% sericin protein, 0.1% sericin protein: normal medium containing 0.1% sericin protein, 0.05% sericin nano-gel: normal medium containing 0.05% sericin nano-gel, 0.1% sericin nano-gel: normal medium containing 0.1% sericin nano-gel.



Figure.3 The Phase contrast microscope photos of MSCs cultured in various medium for 21 days. Many micro-tissues formed in 0.05% and 0.1% sericin nano-gel group. Control: normal media, 0.05% sericin protein: normal medium containing 0.05% sericin protein, 0.1% sericin protein: normal medium containing 0.1% sericin protein, 0.05% sericin nano-gel: normal medium containing 0.05% sericin nano-gel, 0.1% sericin nano-gel: normal medium containing 0.1% sericin nano-gel.



Figure.4 F-actin and nucleus fluorescence staining of MSCs cultured with 0.05% sericin nano-gel medium for 7 days. The F-actin (A and B) and the nucleus (C) stained by phalloidin-FITC and DAPI, respectively. A and B are captured at a same place with different focusing distance.



Figure.5 The Phase contrast microscope photos of MSCs cultured in 0.1% sericin nano-gel medium for 2 days (A) and sericin nano-gel soft aggregations (B) in the medium. They are captured at a same place with

different focusing distance.



Figure.6 Images of DMEM (A) and DMEM containing 0.05% sericin nano-gel (B) captured by mobile phone.
